# Supplementary material for: Prognostic risk prediction model for patients with acute exacerbation of chronic obstructive pulmonary disease (AECOPD): a systematic review and meta-analysis
Source: PubMed Central journal article supplement — Respir Res. 2024 Nov 14;25:410. doi: 10.1186/s12931-024-03033-4 (PMC11566839; doi:10.1186/s12931-024-03033-4), 2024-11-14
Supplement: 12931_2024_3033_MOESM1_ESM.pdf [file 12931_2024_3033_MOESM1_ESM.pdf]

| Number | Author                     | Year | Study reigon      | Study design         | Enrolment period    | Study setting                                                        | Age of participants                                                           | gender of participants                                          |
|--------|----------------------------|------|-------------------|----------------------|---------------------|----------------------------------------------------------------------|-------------------------------------------------------------------------------|-----------------------------------------------------------------|
| 1      | Ying P. Tabak              | 2009 | the United States | Aggregated data      | 2004.1.1-2006.12.31 | Hospitals                                                            | 72 (63-79)                                                                    | 19846 (45.2)                                                    |
| 2      | Ying P. Tabak              | 2013 | the United States | Aggregated data      | 2005.1.1-2007.12.31 | Hospitals                                                            | 70.7 (11.7)                                                                   | 31601 (45.6)                                                    |
| 3      | Peter K. Lindenauer        | 2013 | the United States | Aggregated data      | 2008                | Hospitals                                                            | Unclear                                                                       | No information                                                  |
| 4      | Cassandra M. Batzloff      | 2014 | the United States | Retrospective cohort | 1995.4-2009.11      | Medical ICU of a tertiary academic medical center                    | 70(11)                                                                        | No information                                                  |
| 5      | Matthew Bonomo             | 2022 | the United States | Retrospective cohort | 2008.11-2018.12     | Hospital                                                             | 64 (11)                                                                       | 1231(38.0)                                                      |
| 6      | Shi Chen                   | 2023 | the United States | Aggregated data      | 2002-2019           | ICU of hospital                                                      | 71.26(10.79)                                                                  | 680 (50.52)                                                     |
| 7      | M.J. WILDMAN               | 2009 | the UK            | Prospective cohort   | 2002.3-2003.9       | ICU and Respiratory High Dependency Units (RHDU)                     | Unclear                                                                       | 435(52.3)                                                       |
| 8      | Alex C. Asimwe             | 2011 | the UK            | Retrospective cohort | Unclear             | Hospital                                                             | 71.3 (11.7)                                                                   | 1847 (56.9)                                                     |
| 9      | John Steer                 | 2012 | the UK            | Prospective cohort   | 2008.12-2010.6      | Hospitals                                                            | 73.1 (10.0)                                                                   | 424(46.1)                                                       |
| 10     | C Echevarria               | 2017 | the UK            | Prospective cohort   | 2008.12-2010.6      | Hospitals                                                            | 72.3 (9.9)                                                                    | 447(45.8)                                                       |
| 11     | Tom Hartley                | 2021 | the UK            | Retrospective cohort | 2008.11-2013.5      | Hospitals                                                            | 72.8(10.0)                                                                    | 183(37.4)                                                       |
| 12     | Prachya Mekanimitdee       | 2021 | Thailand          | Retrospective cohort | 2015.10-2017.9      | Tertiary care center                                                 | 74.1 (11.1)                                                                   | 515 (85.8)                                                      |
| 13     | SUSANA GARCÍA-GUTIÉRREZ    | 2014 | Spain             | Prospective cohort   | 2008.6-2010.9       | EDs of hospitals                                                     | 72.3 (9.8)                                                                    | 1,187 (91.5)                                                    |
| 14     | José M Quintana            | 2014 | Spain             | Prospective cohort   | 2008.6-2010.9       | EDs of hospitals                                                     | 72.32 (9.81)                                                                  | 1136 (91.47)                                                    |
| 15     | J. M. Quintana             | 2014 | Spain             | Prospective cohort   | 2008.6-2010.9       | ED of hospital                                                       | No information                                                                | No information                                                  |
| 16     | Pedro Almagro,MD           | 2014 | Spain             | Prospective cohort   | 2009.10-2010.10     | EDs and internal medicine services                                   | 72.6 (9.9)                                                                    | 544(89.8)                                                       |
| 17     | Cristóbal Esteban          | 2015 | Spain             | Prospective cohort   | 2008.6-2010.9       | ED of hospitals                                                      | 72.5 (9.8)                                                                    | 1147(91.6)                                                      |
| 18     | Juan Luis García-Rivero    | 2017 | Spain             | Prospective cohort   | 2013.1-2013.3       | Hospital                                                             | 71.1(9.8)                                                                     | 91 (85.8)                                                       |
| 19     | C esar Alameda             | 2021 | Spain             | Prospective cohort   | 2013.12-2014.11     | Health centres (HC)                                                  | 78(69-83)                                                                     | 1419 (83.7)                                                     |
| 20     | Ying Wang                  | 2014 | Norway            | Retrospective cohort | 2006.3-2008.12      | Hospital                                                             | 73.2(10.8)                                                                    | 271 (46)                                                        |
| 21     | Yukiyo Sakamoto            | 2017 | Japan             | Aggregated data      | 2010.7.1-2013.3.31  | Hospitals                                                            | 76.0(8.9)                                                                     | 2508(81.9)                                                      |
| 22     | Akihiro Shiroshita         | 2022 | Japan             | Retrospective cohort | 2008.4-2020.7       | Acute care hospitals                                                 | 77(8)                                                                         | 1059 (89)                                                       |
| 23     | Jiang-Chen Peng            | 2022 | Israel            | Aggregated data      | 2001-2012           | ICU at Medical Center                                                | 70.8(10.4)                                                                    | 248 (50.2)                                                      |
| 24     | A. Mohan                   | 2007 | India             | Prospective cohort   | 2004.2-2006.3       | Medical wards and ICU of the All India Institute of Medical Sciences | 60.5 (11.4)                                                                   | 120 (79.5)                                                      |
| 25     | Karthikeyan Ramaraju       | 2016 | India             | Retrospective cohort | 2012.8-2013.7       | Tertiary care teaching hospital                                      | 63.85(9.71)                                                                   | 255 (100)                                                       |
| 26     | Filia Diamantea MD         | 2014 | Greece            | Prospective cohort   | 2010.1-2012.6       | Respiratory medicine departments of tertiary hospitals               | 72.0 (65.0-78.0)                                                              | 51(31.1)                                                        |
| 27     | N. Roche                   | 2008 | France            | Prospective cohort   | 2003.11-2004.2      | Emergency departments in hospitals                                   | 72.5 (11.8)                                                                   | 549 (70.0)                                                      |
| 28     | Nicolas Roche              | 2014 | France            | Retrospective cohort | 2006.10-2007.6      | Respiratory medicine department of general hospitals                 | 70.3(11.3)                                                                    | 1401(76.8)                                                      |
| 29     | Liping Fan                 | 2014 | China             | Prospective cohort   | 2012.10-2014.5      | Respiratory ICU of hospital                                          | NPPV SUCCESS: 72.3( 9.3)<br>NPPV FAILURE:74.3( 10.6)                          | NPPV SUCCESS: 143(69.42)<br>NPPV FAILURE:46(83.6)               |
| 30     | Dong Liu                   | 2015 | China             | Prospective cohort   | 2013.11-2014.2      | Respiratory medical ward or intensive care unit in the hospital      | 71(65,77)                                                                     | 144(81.8)                                                       |
| 31     | Qi-fang Shi                | 2018 | China             | Prospective cohort   | 2016.1-2017.12      | ICU of hospital                                                      | 77.57 (7.22)                                                                  | 73(65.18)                                                       |
| 32     | Wei-ping Hu                | 2019 | China             | Retrospective cohort | 2005-2007           | Hospitals                                                            | 74.07(9.89)                                                                   | 586 (85)                                                        |
| 33     | Mi Zhou                    | 2019 | China             | Retrospective cohort | 2011.2-2018.6       | Department of Respiratory and Critical Care Medicine of Hospital     | Mild:76.66 (9.49)<br>Severe:75.06 (7.94)                                      | Mild:240 (77.9)<br>Severe:201 (82.4)                            |
| 34     | Yi Chen                    | 2020 | China             | Retrospective cohort | 2017.1-2018.12      | Hospital                                                             | 75 (66,79)                                                                    | 120(70.18)                                                      |
| 35     | Xing Yu                    | 2020 | China             | Retrospective cohort | 2015.1-2017.12      | Hospital                                                             | 77.0(9.5)                                                                     | 576 (82.9)                                                      |
| 36     | Junfeng Peng               | 2020 | China             | Retrospective cohort | 2011-2018           | Hospital                                                             | Mild:79(9)<br>Severe:82(9)                                                    | Mild:163 (78.4)<br>Severe:178 (88.1)                            |
| 37     | Wei Bi                     | 2020 | China             | Prospective cohort   | 2018.1-2018.12      | Department of Emergency Internal Medicine in the hospitals           | MV:67.06(12.04)<br>NON-MV:63.60(8.82)                                         | 281(62.2%)                                                      |
| 38     | Fen Dong                   | 2021 | China             | Retrospective cohort | 2015.1.1-2019.12.31 | National Clinical Research Center for Respiratory Diseases           | 73(10.0)                                                                      | 743 (67.8)                                                      |
| 39     | Lan Chen                   | 2021 | China             | Retrospective cohort | 2018.1-2020.9       | ED of a tertiary hospital                                            | Live:77.9(11.6)<br>Dead:76.2(10.2)                                            | Live:12 (63.2)<br>Dead:413 (71.0)                               |
| 40     | Lili Chen and Shiping Chen | 2021 | China             | Prospective cohort   | 2016.1-2019.12      | Hospital                                                             | 70.82(9.88)                                                                   | 425 (66.82)                                                     |
| 41     | Lifen Yang                 | 2022 | China             | Retrospective cohort | No information      | Hospital                                                             | 71.23(8.43)                                                                   | 194 (86.22)                                                     |
| 42     | Dawei Chen                 | 2023 | China             | Retrospective cohort | 2014.1-2017.1       | Hospital                                                             | 76.7(9.3)                                                                     | 861(76.8)                                                       |
| 43     | Lin Yu                     | 2023 | China             | Retrospective cohort | 2012.9-2021.8       | Hospital                                                             | 77(6)                                                                         | 529 (80.3)                                                      |
| 44     | Shiyi He                   | 2023 | China             | Prospective cohort   | 2020.1-2022.6       | Hospital                                                             | Respiratory Failure:66.0(62.3,72.8)<br>no Respiratory Failure:70.0(63.3,73.0) | Respiratory Failure:39(81.3)<br>no Respiratory Failure:65(85.5) |
| 45     | Li-Na Yan                  | 2024 | China             | Retrospective cohort | 2020.6-2023.6       | Hospital                                                             | AECOPD:75.61(7.31)<br>AECOPD+AHF:77.15(6.83)                                  | 194(58.8)                                                       |
| 46     | Reza Fakhraei              | 2023 | Canada            | Retrospective cohort | 2012-2018           | General Internal Medicine ward of                                    | 74(12)                                                                        | 2261(62.46)                                                     |
