# Supplementary material for: Prognostic risk prediction model for patients with acute exacerbation of chronic obstructive pulmonary disease (AECOPD): a systematic review and meta-analysis
Source: PubMed Central journal article supplement — Respir Res. 2024 Nov 14;25:410. doi: 10.1186/s12931-024-03033-4 (PMC11566839; doi:10.1186/s12931-024-03033-4), 2024-11-14
Supplement: 12931_2024_3033_MOESM2_ESM.pdf [file 12931_2024_3033_MOESM2_ESM.pdf]

| Number | Author, Year                  | Outcome                  | Modelling method                           | Sample size | Events n (%) | No. predictors Cand. | Final | EPV or EPP | Selection of candidate predictors | Selection of final predictors       | Handling of missing data                        | Type of validation                                              | Performance measures                                                                                                              | C-statistics                                                  | Presentation                    |
|--------|-------------------------------|--------------------------|--------------------------------------------|-------------|--------------|----------------------|-------|------------|-----------------------------------|-------------------------------------|-------------------------------------------------|-----------------------------------------------------------------|-----------------------------------------------------------------------------------------------------------------------------------|---------------------------------------------------------------|---------------------------------|
| 1      | Ying P. Tabak, 2009           | Mortality                | Machine learning techniques: RPART         | 43893       | 774 (1.8)    | 33                   | 4     | 23.45      | Based on prior knowledge          | No information                      | Method: No information                          | Int: Bootstrap<br>Ext: Unclear                                  | Cal: Not evaluated<br>Disc: C-Statistic<br>Ov: Not evaluated                                                                      | 0.72(0.70-0.74)                                               | None                            |
| 2      | Ying P. Tabak, 2013           | Mortality                | Logistic regression                        | 69299       | 2240 (3.2)   | 35                   | 25    | 64.00      | Based on univariable associations | No information                      | Method: Put missing values in a separate column | Int: None (Apparent performance)<br>Ext: Temporal               | Cal: Calibration plot / HL test<br>Disc: C-Statistic<br>Ov: Not evaluated                                                         | 0.83(0.82-0.84)                                               | Score system                    |
| 3      | Peter K. Lindenauer, 2013     | Mortality                | Logistic regression                        | 150035      | 12903 (8.6)  | Unkown               | 42    | 307.20     | Based on prior knowledge          | No information                      | Method: No information                          | Int: Random split data<br>Ext: None                             | Disc: C-Statistic<br>Ov: Not evaluated<br>Cal: HL test                                                                            | 0.72                                                          | None                            |
| 4      | Cassandra M. Batzloff, 2014   | Mortality                | Logistic regression                        | 591         | 295 (49.9)   | 8                    | 2     | 36.88      | Based on univariable associations | Stepwise selection                  | Method: No information                          | Int: Bootstrap<br>Ext: None                                     | Disc: C-Statistic<br>Ov: Not evaluated                                                                                            | 0.68(0.686-0.688)                                             | Score system                    |
| 5      | Matthew Bonomo, 2022          | Readmission              | Machine learning techniques: Random forest | 3238        | 1103 (34.1)  | 20                   | 5     | 55.15      | Based on prior knowledge          | No information                      | Method: Single imputation                       | Int: Random split data and cross-validation<br>Ext: None        | Cal: Calibration plot / Slope / calibration intercept<br>Disc: C-Statistic / AUC graph<br>Cal: Calibration plot                   | 0.69 (0.66-0.73)                                              | None                            |
| 6      | Shi Chen, 2023                | Mortality                | Logistic regression                        | 1346        | 185 (13.7)   | 22                   | 15    | 8.41       | Based on univariable associations | No information                      | Method: Complete-case analysis                  | Int: Random split data<br>Ext: Completely independent           | Disc: C-Statistic / AUC graph<br>Ov: Not evaluated<br>Cal: Calibration plot / Slope / HL test                                     | 0.785(0.751-0.820)                                            | Nomogram                        |
| 7      | M.J. WILDMAN, 2009            | Mortality                | Logistic regression                        | 832         | 517 (62.1)   | 22                   | 9     | 14.32      | Based on prior knowledge          | Backward elimination                | Method: Single imputation                       | Int: Bootstrap<br>Ext: None                                     | Disc: C-Statistic<br>Ov: Not evaluated<br>Cal: Not evaluated                                                                      | 0.747                                                         | Score system                    |
| 8      | Alex C. Asimwe, 2011          | Mortality                | Machine learning techniques: CART          | 4986        | 452 (9.1)    | 29                   | 3     | 15.59      | Based on prior knowledge          | No information                      | Method: No information                          | Int: Random split data<br>Ext: None                             | Disc: C-Statistic / AUC graph / sensitivity and specificity<br>Ov: Not evaluated<br>Cal: HL test                                  | 0.734(0.723-0.756)                                            | None                            |
| 9      | John Steer, 2012              | Mortality                | Logistic regression                        | 920         | 96 (10.4)    | 54                   | 5     | 1.78       | Based on univariable associations | Backward elimination                | Method: Multiple imputation                     | Int: Bootstrap<br>Ext: None                                     | Disc: C-Statistic / AUC graph<br>Ov: Not evaluated<br>Cal: Calibration plot / HL test                                             | 0.86(0.82-0.89)                                               | Score system                    |
| 10     | C Echevarria, 2017            | Poor outcome             | Logistic regression                        | 824         | 297 (36.0)   | 23                   | 5     | 12.91      | Based on prior knowledge          | Backward elimination                | Method: Multiple imputation                     | Int: Temporal?<br>Ext: Different setting                        | Disc: C-Statistic / AUC graph<br>Ov: Not evaluated<br>Cal: Calibration plot / HL test / Studentised residuals and Cook's distance | 0.73(0.70-0.77)                                               | Score system                    |
| 11     | Tom Hartley, 2021             | Mortality                | Logistic regression                        | 489         | 124 (25.4)   | 21                   | 6     | 5.90       | Based on univariable associations | Backward elimination                | Method: Multiple imputation                     | Int: None (Apparent performance)<br>Ext: Completely independent | Disc: C-Statistic / AUC graph<br>Ov: Not evaluated<br>Cal: Calibration plot / Slope / HL test                                     | 0.79(0.75-0.83)                                               | Score system                    |
| 12     | Prachya Mekanimidee, 2021     | Mortality                | Logistic regression                        | 923         | 101 (10.9)   | 12                   | 7     | 8.42       | Based on univariable associations | Backward elimination                | Method: Multiple imputation                     | Int: Bootstrap<br>Ext: None                                     | Disc: C-Statistic / AUC graph<br>Ov: Not evaluated<br>Cal: HL test                                                                | 0.82(0.77-0.86)                                               | Sum score and online calculator |
| 13     | SUSANA GARCÍA-GUTIÉRREZ, 2014 | Poor outcome             | Logistic regression                        | 1243        | 99 (8.0)     | 18                   | 3     | 5.50       | Based on univariable associations | No information                      | Method: Complete-case analysis                  | Int: Random split data and Bootstrap<br>Ext: None               | Disc: C-Statistic / AUC graph<br>Ov: Not evaluated<br>Cal: Calibration plot / HL test                                             | 0.8(0.8 - 0.9)                                                | Score system                    |
| 14     | José M Quintana, 2014         | Mortality                | Logistic regression                        | 1242        | 30 (2.4)     | 24                   | 5     | 1.25       | Based on univariable associations | No information                      | Method: Single imputation                       | Int: Random split data<br>Ext: None                             | Disc: C-Statistic / sensitivity and specificity<br>Ov: Not evaluated<br>Cal: HL test                                              | continuous:0.85(0.77 - 0.93)<br>categorical:0.84(0.76 - 0.91) | Score system                    |
| 15     | J. M. Quintana, 2014 (1)      | ICU/RICU admission       | Logistic regression                        | 1078        | 135 (12.5)   | 17                   | 3     | 7.94       | Based on univariable associations | No information                      | Method: Single and multiple imputation          | Int: Random split data<br>Ext: None                             | Disc: C-Statistic / AUC graph<br>Ov: Not evaluated<br>Cal: HL test                                                                | continuous: 0.87(0.84-0.90)<br>categorical: 0.84(0.81 - 0.87) | Score system                    |
| 16     | J. M. Quintana, 2014 (2)      | IRCU admission           | Logistic regression                        | 1078        | 135 (12.5)   | 17                   | 2     | 7.94       | Based on univariable associations | No information                      | Method: Single and multiple imputation          | Int: Random split data<br>Ext: None                             | Disc: C-Statistic / AUC graph<br>Ov: Not evaluated<br>Cal: HL test                                                                | 0.86(0.83-0.90)                                               | None                            |
| 17     | J. M. Quintana, 2014 (3)      | ICU admission            | Logistic regression                        | 1078        | 135 (12.5)   | 17                   | 2     | 7.94       | Based on univariable associations | No information                      | Method: Single and multiple imputation          | Int: Random split data<br>Ext: None                             | Disc: C-Statistic / AUC graph<br>Ov: Not evaluated<br>Cal: HL test                                                                | 0.83(0.75-0.91)                                               | None                            |
| 18     | J. M. Quintana, 2014 (4)      | Mortality                | Logistic regression                        | 1078        | 135 (12.5)   | 17                   | 4     | 7.94       | Based on univariable associations | No information                      | Method: Single and multiple imputation          | Int: Random split data<br>Ext: None                             | Disc: C-Statistic / AUC graph<br>Ov: Not evaluated<br>Cal: HL test                                                                | 0.78(0.71-0.85)                                               | None                            |
| 19     | J. M. Quintana, 2014 (5)      | Mortality                | Logistic regression                        | 1078        | 135 (12.5)   | 17                   | 3     | 7.94       | Based on univariable associations | No information                      | Method: Single and multiple imputation          | Int: Random split data<br>Ext: None                             | Disc: C-Statistic / AUC graph<br>Ov: Not evaluated<br>Cal: HL test                                                                | 0.74(0.63-0.84)                                               | None                            |
| 20     | J. M. Quintana, 2014 (6)      | Mortality                | Logistic regression                        | 1078        | 135 (12.5)   | 17                   | 3     | 7.94       | Based on univariable associations | No information                      | Method: Single and multiple imputation          | Int: Random split data<br>Ext: None                             | Disc: C-Statistic / AUC graph<br>Ov: Not evaluated<br>Cal: HL test                                                                | 0.86(0.77-0.95)                                               | None                            |
| 21     | Pedro Almagro , MD, 2014      | Mortality                | no information                             | 606         | 27 (4.5)     | 5                    | 5     | 2.70       | Based on prior knowledge          | No information                      | Method: No information                          | Int: None (Apparent performance)<br>Ext: Completely independent | Disc: C-Statistic / AUC graph / K-M<br>Ov: Not evaluated<br>Cal: Not evaluated                                                    | 0.73                                                          | Score system                    |
| 22     | Cristóbal Esteban, 2015       | Mortality                | Machine learning techniques: CART          | 1252        | 134 (10.7)   | 15                   | 5     | 8.93       | Based on univariable associations | Pre-specified model (not selection) | Method: Put missing values in a separate column | Int: Bootstrap<br>Ext: None                                     | Disc: C-Statistic / AUC graph<br>Ov: Not evaluated<br>Cal: HL test                                                                | 0.835(0.783-0.888)                                            | None                            |
| 23     | Juan Luis García-Rivero, 2017 | Poor outcome             | Logistic regression                        | 106         | 39 (36.8)    | 13                   | 4     | 3.00       | Based on univariable associations | Backward elimination                | Method: No information                          | Int: None (Apparent performance)<br>Ext: None                   | Disc: C-Statistic / AUC graph<br>Ov: Not evaluated<br>Cal: Calibration plot / Slope / Intercept                                   | 0.75(0.64-0.85)                                               | None                            |
| 24     | Cesar Alameda, 2021           | Mortality                | Logistic regression                        | 1696        | 17 (1.0)     | 30                   | 3     | 0.57       | Based on univariable associations | Stepwise selection                  | Method: Multiple imputation                     | Int: Bootstrap<br>Ext: None                                     | Disc: C-Statistic / AUC graph<br>Ov: Not evaluated<br>Cal: Not evaluated                                                          | 0.811                                                         | Score system                    |
| 25     | Ying Wang, 2014               | Prolonged length of stay | Logistic regression                        | 599         | 150          | 31                   | 6     | 4.80       | Based on univariable associations | Manual stepwise selection           | Method: Single imputation                       | Int: None (Apparent performance)<br>Ext: None                   | Disc: C-Statistic / AUC graph<br>Ov: Not evaluated<br>Cal: Calibration plot                                                       | 0.73                                                          | None                            |
| 26     | Yukiyo Sakamoto, 2017         | Mortality                | Logistic regression                        | 3064        | 209 (6.8)    | 10                   | 8     | 20.90      | Based on prior knowledge          | No information                      | Method: No information                          | Int: Bootstrap<br>Ext: None                                     | Disc: C-Statistic<br>Ov: Not evaluated<br>Cal: Calibration plot                                                                   | 0.775                                                         | Nomogram                        |
| 27     | Akihiro Shiroshita, 2022      | Mortality                | Machine learning techniques: XGBoost       | 1190        | 88 (7.4)     | 10                   | 10    | 8.80       | Based on prior knowledge          | No information                      | Method: No processing                           | Int: Random split data and cross-validation<br>Ext: None        | Disc: C-Statistic / AUC graph<br>Ov: Not evaluated<br>Cal: Not evaluated                                                          | 0.76                                                          | None                            |
| 28     | Jiang-Chen Peng, 2022         | Mortality                | Logistic regression                        | 494         | 77 (15.6)    | 32                   | 6     | 2.41       | Based on univariable associations | Backward elimination                | Method: Single imputation                       | Int: Bootstrap<br>Ext: None                                     | Disc: C-Statistic / AUC graph / Risk group curves<br>Cal: Not evaluated                                                           | 0.745(0.712-0.778)                                            | Nomogram                        |
| 29     | A. Mohan, 2007                | Mortality                | Logistic regression                        | 151         | 38 (25.2)    | 23                   | 2     | 1.65       | Based on univariable associations | Stepwise selection                  | Method: No information                          | Int: None (Apparent performance)<br>Ext: None                   | Disc: C-Statistic / AUC graph / Sensitivity and specificity<br>Ov: Not evaluated<br>Cal: Not evaluated                            | 0.73(0.63 - 0.82)                                             | Sum score                       |
| 29     | A. Mohan, 2007                | Mortality                | Logistic regression                        | 151         | 99 (65.6)    | 23                   | 3     | 2.26       | Based on univariable associations | Stepwise selection                  | Method: No information                          | Int: None (Apparent performance)<br>Ext: None                   | Disc: C-Statistic / AUC graph / Sensitivity and specificity<br>Ov: Not evaluated<br>Cal: HL test                                  | 0.73(0.63 - 0.82)                                             | Sum score                       |
| 31     | Karthikeyan Ramaraju, 2016    | Prolonged hospital stay  | Logistic regression                        | 255         | 71 (27.8)    | 17                   | 3     | 4.18       | Based on univariable associations | Stepwise selection                  | Method: No information                          | Int: None (Apparent performance)<br>Ext: None                   | Disc: C-Statistic / AUC graph<br>Ov: Not evaluated<br>Cal: HL test                                                                | 0.805(0.729-0.881)                                            | Sum score                       |
| 31     | Karthikeyan Ramaraju, 2016    | Prolonged hospital stay  | Logistic regression                        | 255         | 41 (16.1)    | 17                   | 4     | 2.41       | Based on univariable associations | Stepwise selection                  | Method: No information                          | Int: None (Apparent performance)<br>Ext: None                   | Disc: C-Statistic / AUC graph<br>Ov: Not evaluated<br>Cal: Not evaluated                                                          | 0.805(0.729-0.881)                                            | Sum score                       |
| 33     | Filia Diamante MD, 2014       | Prolonged length of stay | Unclear                                    | 164         | 84 (51.2)    | 21                   | 7     | 3.81       | Based on univariable associations | Other                               | Method: No information                          | Int: None (Apparent performance)<br>Ext: Temporal               | Disc: C-Statistic<br>Ov: Not evaluated                                                                                            | 0.960 (0.917-0.984)                                           | Score system                    |

|    |                                  |                          |                                            |      |            |    |    |       |                                   |                      |                                |                                                                                              |                                                                                                                     |                       |              |
|----|----------------------------------|--------------------------|--------------------------------------------|------|------------|----|----|-------|-----------------------------------|----------------------|--------------------------------|----------------------------------------------------------------------------------------------|---------------------------------------------------------------------------------------------------------------------|-----------------------|--------------|
| 34 | N. Roche, 2008                   | Mortality                | Logistic regression                        | 794  | 59 (7.4)   | 17 | 3  | 3.47  | Based on univariable associations | Backward elimination | Method: No information         | Int: Random split data<br>Ext: None                                                          | Cal: Not evaluated<br>Disc: C-Statistic<br>Ov: Not evaluated<br>Cal: Not evaluated                                  | 0.79                  | Score system |
| 35 | Nicolas Roche, 2014              | Mortality                | Logistic regression                        | 1824 | 45 (2.5)   | 44 | 4  | 1.02  | Based on univariable associations | Backward elimination | Method: No information         | Int: Bootstrap<br>Ext: Different setting                                                     | Disc: C-Statistic<br>Ov: Not evaluated<br>Cal: Not evaluated                                                        | 0.79(0.74-0.82)       | Score system |
| 36 | Yi Chen, 2020                    | ICU admission            | Logistic regression                        | 171  | 36 (21.1)  | 14 | 2  | 2.57  | Based on univariable associations | No information       | Method: Complete-case analysis | Int: None (Apparent performance)<br>Ext: None<br>Int: None (Apparent performance)            | Disc: C-Statistic / AUC graph<br>Ov: Not evaluated<br>Cal: Not evaluated                                            | 0.92(0.86-0.97)       | None         |
| 37 | Liping Fan, 2014                 | NPPV failures            | Logistic regression                        | 261  | 55 (21.1)  | 16 | 3  | 3.44  | Based on univariable associations | Stepwise selection   | Method: No information         | Int: None (Apparent performance)<br>Ext: None<br>Int: None (Apparent performance)            | Disc: C-Statistic / AUC graph<br>Ov: Not evaluated<br>Cal: Not evaluated                                            | 0.86(0.81-0.90)       | None         |
| 38 | Dong Liu, 2015                   | Re-exacerbation          | Logistic regression                        | 176  | 86 (48.9)  | 14 | 10 | 6.14  | Based on univariable associations | No information       | Method: No information         | Int: None (Apparent performance)<br>Ext: None<br>Int: None (Apparent performance)            | Disc: C-Statistic / AUC graph<br>Ov: Not evaluated<br>Cal: Not evaluated                                            | 0.75(0.678-0.821)     | Score system |
| 39 | Qi-fang Shi, 2018                | Mortality                | no information                             | 112  | 38 (33.9)  | 5  | 5  | 1.41  | Based on univariable associations | Backward elimination | Method: No information         | Int: None (Apparent performance)<br>Ext: None<br>Int: None (Apparent performance)            | Disc: C-Statistic / AUC graph<br>Ov: Not evaluated<br>Cal: Not evaluated                                            | 0.852                 | Score system |
| 40 | Wei-ping Hu, 2019                | Re-exacerbation          | Logistic regression                        | 686  | 109 (15.9) | 16 | 8  | 6.81  | Based on prior knowledge          | Backward elimination | Method: No information         | Int: Bootstrap<br>Ext: None                                                                  | Cal: Calibration plot<br>Disc: C-Statistic<br>Ov: Not evaluated<br>Cal: Not evaluated                               | 0.702(0.648-0.756)    | Nomogram     |
| 41 | Mi Zhou, 2019                    | Poor outcome             | Machine learning techniques: CART          | 552  | 244        | 7  | 7  | 34.90 | Based on prior knowledge          | No information       | Method: Complete-case analysis | Int: Random split data and cross-validation<br>Ext: None                                     | Disc: C-Statistic / AUC graph<br>Ov: Not evaluated<br>Cal: Not evaluated                                            | 0.75                  | None         |
| 42 | Xing Yu, 2020                    | Mortality                | Logistic regression                        | 695  | 42 (6.0)   | 39 | 6  | 1.08  | Based on univariable associations | No information       | Method: No information         | Int: Temporal?<br>Ext: Different setting                                                     | Disc: C-Statistic / AUC graph<br>Ov: Not evaluated<br>Cal: Not evaluated                                            | 0.929                 | Score system |
| 43 | Junfeng Peng, 2020               | Severity                 | Machine learning techniques: C5.0          | 410  | 202 (49.3) | 28 | 28 | 7.21  | Based on prior knowledge          | Unclear              | Method: No information         | Int: Random split data and cross-validation<br>Ext: None<br>Int: None (Apparent performance) | Disc: C-Statistic / AUC graph<br>Ov: Not evaluated<br>Cal: Not evaluated                                            | 0.803                 | None         |
| 44 | Wei Bi, 2020                     | Mechanical ventilation   | Logistic regression                        | 452  | 158 (35.0) | 6  | 4  | 26.33 | Based on univariable associations | No information       | Method: No information         | Int: None (Apparent performance)<br>Ext: None                                                | Disc: C-Statistic / AUC graph<br>Ov: Not evaluated<br>Cal: Not evaluated                                            | 0.826(0.786-0.866)    | Sum score    |
| 45 | Fen Dong, 2021                   | Mortality                | Logistic regression                        | 1096 | 29 (2.6)   | 22 | 4  | 1.32  | Based on univariable associations | LASSO selection      | Method: No information         | Int: Bootstrap<br>Ext: Temporal                                                              | Cal: Calibration plot / Slope / HL test<br>Disc: C-Statistic / AUC graph<br>Ov: Not evaluated<br>Cal: Not evaluated | 0.9147(0.8850-0.9444) | Score system |
| 46 | Lan Chen, 2021                   | Mortality                | Logistic regression                        | 601  | 19 (3.2)   | 80 | 8  | 0.24  | Based on prior knowledge          | LASSO selection      | Method: No information         | Int: Bootstrap<br>Ext: None                                                                  | Disc: C-Statistic / AUC graph<br>Ov: Not evaluated<br>Cal: Not evaluated                                            | 0.94(0.895- 0.985)    | Nomogram     |
| 47 | Lili Chen and Shiping Chen, 2021 | Readmission              | Machine learning techniques: XGBoost       | 636  | 187 (29.4) | 55 | 26 | 3.40  | Based on univariable associations | No information       | Method: Multiple imputation    | Int: Random split data<br>Ext: None                                                          | Disc: C-Statistic / AUC graph<br>Ov: Not evaluated<br>Cal: Not evaluated                                            | 0.814(0.812-0.815)    | None         |
| 48 | Lifen Yang, 2022                 | Prolonged length of stay | Logistic regression                        | 225  | 152 (67.6) | 40 | 11 | 1.83  | Based on univariable associations | Stepwise selection   | Method: No information         | Int: None (Apparent performance)<br>Ext: None                                                | Cal: Calibration plot / HL test<br>Disc: C-Statistic / AUC graph<br>Ov: Not evaluated<br>Cal: Not evaluated         | 0.795(0.730-0.861)    | None         |
| 49 | Dawei Chen, 2023                 | Mortality                | Logistic regression                        | 1121 | 79 (7.0)   | 35 | 5  | 2.26  | Based on univariable associations | No information       | Method: No information         | Int: Bootstrap<br>Ext: Different setting                                                     | Disc: C-Statistic / AUC graph<br>Ov: Not evaluated<br>Cal: Not evaluated                                            | 0.85(0.81-0.89)       | Score system |
| 50 | Lin Yu, 2023                     | Mortality                | Machine learning techniques: Random Forest | 658  | 42 (6.4)   | 10 | 9  | 4.20  | Based on prior knowledge          | Unclear              | Method: Multiple imputation    | Int: Random split data and Bootstrap<br>Ext: None                                            | Disc: C-Statistic / AUC graph<br>Ov: Not evaluated<br>Cal: Calibration plot                                         | 0.80 (0.75-0.84)      | None         |
| 51 | Shiyi He, 2023                   | Respiratory Failure      | Logistic regression                        | 124  | 48 (38.7)  | 21 | 3  | 2.29  | Based on univariable associations | No information       | Method: No information         | Int: Bootstrap<br>Ext: None                                                                  | Disc: C-Statistic / AUC graph<br>Ov: Not evaluated<br>Cal: Calibration plot                                         | 0.77(0.70-0.86)       | Nomogram     |
| 52 | Li-Na Yan, 2024                  | Acute heart failure      | Logistic regression                        | 330  | 130 (39.4) | 26 | 9  | 5.00  | Based on univariable associations | No information       | Method: No information         | Int: None (Apparent performance)<br>Ext: Different setting                                   | Cal: Calibration plot / HL test<br>Disc: C-Statistic / AUC graph<br>Ov: Not evaluated<br>Cal: Not evaluated         | 0.949(0.91-0.961)     | Nomogram     |
| 53 | Reza Fakhraei, 2023              | Readmission              | logistic regression                        | 3620 | 518 (14.3) | 82 | 2  | 6.32  | Based on prior knowledge          | Forward selection    | Method: Single imputation      | Int: Cross-validation<br>Ext: None                                                           | Disc: C-Statistic<br>Ov: Not evaluated                                                                              | 0.77                  | None         |
