# Supplementary material for: Prognostic risk prediction model for patients with acute exacerbation of chronic obstructive pulmonary disease (AECOPD): a systematic review and meta-analysis
Source: PubMed Central journal article supplement — Respir Res. 2024 Nov 14;25:410. doi: 10.1186/s12931-024-03033-4 (PMC11566839; doi:10.1186/s12931-024-03033-4), 2024-11-14
Supplement: 12931_2024_3033_MOESM3_ESM.pdf [file 12931_2024_3033_MOESM3_ESM.pdf]

| Author, Year                  | Risk of Bias    |               |            |             | Applicability   |               |            | Overall      |               |
|-------------------------------|-----------------|---------------|------------|-------------|-----------------|---------------|------------|--------------|---------------|
|                               | 1. Participants | 2. Predictors | 3. Outcome | 4. Analysis | 1. Participants | 2. Predictors | 3. Outcome | Risk of Bias | Applicability |
| Ying P. Tabak, 2009           | +               | -             | +          | -           | +               | +             | +          | -            | +             |
| Ying P. Tabak, 2013           | +               | -             | +          | -           | +               | +             | +          | -            | +             |
| Peter K. Lindenauer, 2013     | +               | -             | +          | -           | +               | +             | +          | -            | +             |
| Cassandra M. Batzlaff, 2014   | +               | +             | +          | -           | +               | +             | +          | -            | +             |
| Matthew Bonomo, 2022          | +               | +             | +          | -           | +               | +             | +          | -            | +             |
| Shi Chen, 2023                | +               | -             | +          | -           | +               | +             | +          | -            | +             |
| M.J. WILDMAN, 2009            | +               | -             | +          | +           | +               | +             | +          | -            | +             |
| Alex C. Asimwe, 2011          | -               | +             | +          | -           | +               | +             | +          | -            | +             |
| John Steer, 2012              | +               | +             | +          | -           | +               | +             | +          | -            | +             |
| C Echevarria, 2017            | +               | +             | +          | +           | +               | +             | +          | +            | +             |
| Tom Hartley, 2021             | +               | +             | +          | -           | +               | +             | +          | -            | +             |
| Prachya Mekanimitdee, 2021    | -               | +             | +          | -           | +               | +             | +          | -            | +             |
| SUSANA GARCÍA-GUTIÉRREZ, 2014 | +               | -             | -          | -           | +               | +             | +          | -            | +             |
| José M Quintana, 2014         | -               | -             | +          | -           | +               | +             | +          | -            | +             |
| J. M. Quintana, 2014 (1)      | -               | -             | -          | -           | +               | +             | +          | -            | +             |
| J. M. Quintana, 2014 (2)      | -               | -             | +          | -           | +               | +             | +          | -            | +             |
| J. M. Quintana, 2014 (3)      | -               | -             | +          | -           | +               | +             | +          | -            | +             |
| J. M. Quintana, 2014 (4)      | -               | -             | +          | -           | +               | +             | +          | -            | +             |
| J. M. Quintana, 2014 (5)      | -               | -             | +          | -           | +               | +             | +          | -            | +             |
| J. M. Quintana, 2014 (6)      | -               | -             | +          | -           | +               | +             | +          | -            | +             |
| Pedro Almagro , MD, 2014      | -               | -             | +          | -           | +               | +             | +          | -            | +             |
| Cristóbal Esteban, 2015       | -               | +             | +          | -           | +               | +             | +          | -            | +             |
| Juan Luis García-Rivero, 2017 | -               | -             | +          | -           | +               | +             | +          | -            | +             |
| Cesar Alameda, 2021           | +               | -             | +          | -           | +               | +             | +          | -            | +             |
| Ying Wang, 2014               | +               | +             | +          | -           | +               | +             | +          | -            | +             |
| Yukiyo Sakamoto, 2017         | -               | -             | +          | -           | +               | +             | +          | -            | +             |
| Akihiro Shiroshita, 2022      | -               | -             | +          | -           | +               | +             | +          | -            | +             |
| Jiang-Chen Peng, 2022         | +               | -             | +          | -           | +               | +             | +          | -            | +             |
| A. Mohan, 2007                | +               | +             | +          | -           | +               | +             | +          | -            | +             |
| A. Mohan, 2007                | +               | +             | -          | -           | +               | +             | +          | -            | +             |
| Karthikeyan Ramaraju, 2016    | +               | +             | +          | -           | +               | +             | +          | -            | +             |
| Karthikeyan Ramaraju, 2016    | +               | +             | +          | -           | +               | +             | +          | -            | +             |
| Filia Diamantea MD, 2014      | -               | +             | +          | -           | +               | +             | +          | -            | +             |
| N. Roche, 2008                | -               | -             | +          | -           | +               | +             | +          | -            | +             |
| Nicolas Roche, 2014           | +               | +             | +          | -           | +               | +             | +          | -            | +             |
| Yi Chen, 2020                 | -               | +             | -          | -           | +               | +             | +          | -            | +             |
| Liping Fan, 2014              | +               | +             | -          | -           | +               | +             | +          | -            | +             |
| Dong Liu, 2015                | -               | +             | +          | -           | +               | +             | +          | -            | +             |
| Qi-fang Shi, 2018             | -               | +             | +          | -           | +               | +             | +          | -            | +             |

**Risk of Bias:**

|                 | LOW | HIGH |
|-----------------|-----|------|
| 1. Participants | 26  | 27   |
| 2. Predictors   | 31  | 22   |
| 3. Outcome      | 44  | 9    |
| 4. Analysis     | 2   | 51   |
| Risk of Bias    | 1   | 52   |

|                                  |   |   |   |   |   |   |   |   |   |
|----------------------------------|---|---|---|---|---|---|---|---|---|
| Wei-ping Hu, 2019                | + | + | + | - | + | + | + | - | + |
| Mi Zhou, 2019                    | + | + | - | - | + | + | + | - | + |
| Xing Yu, 2020                    | - | + | + | - | + | + | + | - | + |
| Junfeng Peng, 2020               | + | + | + | - | + | + | + | - | + |
| Wei Bi, 2020                     | - | + | - | - | + | + | + | - | + |
| Fen Dong, 2021                   | - | - | + | - | + | + | + | - | + |
| Lan Chen, 2021                   | - | + | + | - | + | + | + | - | + |
| Lili Chen and Shiping Chen, 2021 | + | + | + | - | + | + | + | - | + |
| Lifen Yang, 2022                 | - | - | + | - | + | + | + | - | + |
| Dawei Chen, 2023                 | + | + | + | - | + | + | + | - | + |
| Lin Yu, 2023                     | - | + | + | - | + | + | + | - | + |
| Shiyi He, 2023                   | - | + | - | - | + | + | + | - | + |
| Li-Na Yan, 2024                  | - | + | - | - | + | + | + | - | + |
| Reza Fakhraei, 2023              | + | + | + | - | + | + | + | - | + |
